# Supplementary material for: Differences in drug use between men and women: an Italian cross sectional study
Source: PubMed Central journal article supplement (PMC5583764; doi:10.1186/s12905-017-0424-9), 2017-09-05
Supplement: 12905_2017_424_MOESM1_ESM.pdf [file 12905_2017_424_MOESM1_ESM.pdf]

| ATC code | Pharmacological group                                               | Male  | Female | Crude RR<br>(Female/Male) | Age-adjusted RR<br>(Female/Male) | 95%<br>Lower<br>bound | 95% Upper<br>Bound |
|----------|---------------------------------------------------------------------|-------|--------|---------------------------|----------------------------------|-----------------------|--------------------|
| G04C     | Drugs used in benign prostatic hypertrophy                          | 60,5  | 0,2    | 0,0                       | 0,0                              | 0,0                   | 0,0                |
| M04A     | Antigout Preparations                                               | 20,4  | 11,3   | 0,6                       | 0,4                              | 0,4                   | 0,4                |
| C01D     | Vasodilators Used In Cardiac Diseases                               | 14,7  | 14,2   | 1,0                       | 0,7                              | 0,7                   | 0,7                |
| C09A     | Ace Inhibitors, Plain                                               | 68,6  | 57,6   | 0,8                       | 0,7                              | 0,7                   | 0,7                |
| B01A     | Antithrombotic Agents                                               | 111,2 | 104,6  | 0,9                       | 0,7                              | 0,7                   | 0,7                |
| C01B     | Antiarrhythmics, Class I And III                                    | 10,3  | 9,9    | 1,0                       | 0,7                              | 0,7                   | 0,7                |
| C02C     | Antiadrenergic Agents, Peripherally Acting                          | 13,1  | 11,7   | 0,9                       | 0,7                              | 0,7                   | 0,7                |
| C08C     | Selective Calcium Channel Blockers With Mainly Vascular Effects     | 56,3  | 51,7   | 0,9                       | 0,7                              | 0,7                   | 0,7                |
| A10B     | Blood Glucose Lowering Drugs, Excl. Insulins                        | 49,4  | 44,9   | 0,9                       | 0,8                              | 0,8                   | 0,8                |
| R03A     | Adrenergics, Inhalants                                              | 32,5  | 29,7   | 0,9                       | 0,8                              | 0,8                   | 0,8                |
| C10A     | Lipid Modifying Agents, Plain                                       | 95,5  | 89,8   | 0,9                       | 0,8                              | 0,8                   | 0,8                |
| A10A     | Insulins And Analogues                                              | 10,6  | 10,3   | 1,0                       | 0,8                              | 0,8                   | 0,8                |
| R03B     | Other Drugs For Obstructive Airway Diseases, Inhalants              | 28,0  | 27,1   | 1,0                       | 0,8                              | 0,8                   | 0,8                |
| C09C     | Angiotensin II Antagonists, Plain                                   | 45,7  | 48,1   | 1,1                       | 0,9                              | 0,9                   | 0,9                |
| C03C     | High-Ceiling Diuretics                                              | 25,8  | 33,4   | 1,3                       | 0,9                              | 0,9                   | 0,9                |
| C07A     | Beta Blocking Agents                                                | 70,5  | 83,3   | 1,2                       | 1,0                              | 1,0                   | 1,0                |
| S01E     | Antiglaucoma Preparations And Miotics                               | 16,6  | 20,8   | 1,3                       | 1,0                              | 1,0                   | 1,0                |
| C09B     | Ace Inhibitors, Combinations                                        | 35,3  | 44,0   | 1,2                       | 1,0                              | 1,0                   | 1,0                |
| N03A     | Antiepileptics                                                      | 18,3  | 21,3   | 1,2                       | 1,1                              | 1,1                   | 1,1                |
| A02B     | Drugs For Peptic Ulcer And Gastro-Oesophageal Reflux Disease (Gord) | 125,2 | 161,2  | 1,3                       | 1,1                              | 1,1                   | 1,1                |
| C09D     | Angiotensin II Antagonists, Combinations                            | 45,2  | 61,1   | 1,4                       | 1,1                              | 1,1                   | 1,1                |
| R06A     | Antihistamines For Systemic Use                                     | 20,3  | 25,9   | 1,3                       | 1,3                              | 1,3                   | 1,3                |
| H02A     | Corticosteroids For Systemic Use, Plain                             | 22,7  | 32,4   | 1,4                       | 1,3                              | 1,3                   | 1,3                |
| J01C     | Beta-Lactam Antibacterials, Penicillins                             | 52,1  | 69,9   | 1,3                       | 1,3                              | 1,3                   | 1,3                |
| M01A     | Antiinflammatory And Antirheumatic Products, Non-Steroids           | 72,2  | 122,4  | 1,7                       | 1,5                              | 1,5                   | 1,5                |
| B03B     | Vitamin B12 And Folic Acid                                          | 3,6   | 6,9    | 1,9                       | 1,6                              | 1,6                   | 1,6                |
| N06A     | Antidepressants                                                     | 28,8  | 66,8   | 2,3                       | 2,0                              | 2,0                   | 2,0                |
| B03A     | Iron Preparations                                                   | 3,8   | 9,9    | 2,6                       | 2,1                              | 2,1                   | 2,1                |
| H03A     | Thyroid Preparations                                                | 11,7  | 63,7   | 5,4                       | 5,0                              | 5,0                   | 5,0                |
| A12A     | Calcium                                                             | 2,8   | 23,9   | 8,6                       | 7,0                              | 7,0                   | 7,0                |
| M05B     | Drugs Affecting Bone Structure And Mineralization                   | 2,0   | 31,2   | 16,0                      | 12,5                             | 12,5                  | 12,5               |
